# Supplementary material for: Biogenic Amines Profile Characterization in Glioblastoma Patients Undergoing Standard of Care Treatment
Source: Preprints.org preprint supplement (doi:10.20944/preprints202307.0471.v1), 2023-07-07
Supplement: Supplementary file 3 [file Supplementary Data 1.xlsx]

## Sheet: README
Each tab represents a feature importance method. Ranks are based on the absolute value of feature coefficient. For multiclass feature coefficients, the mean of absolute feature coefficient is ranked.

## Sheet: Principal Component Analysis
Feature	Feature Coefficient	Rank
tetrasaccharide	0.00572191	292
(.+/-.)-Norketamine	-0.0670977	85
(2,4-Dinitrophenoxy)acetic acid	-0.0769493	59
(2-oxo-2,3-dihydro-1H-indol-3-yl)acetic acid	0.0381128	151
(2R)-3-Hydroxyisovaleroylcarnitine	0.126365	5
(Diethylamino)(oxo)acetic acid	0.00674419	283
1-(2-Hydroxyethyl)-2,2,6,6-tetramethyl-4-piperidinol	0.0091275	266
1,2-Dilinoleoylglycerol	-0.0129002	242
1,3 Cyclohexanedione	0.024462	192
1,4-Cyclohexanedicarboxylic acid	0.0315901	167
1,5-Pentanediamine	0.0833017	52
10,11-Dihydro-10-hydroxycarbamazepine	-0.0246589	189
10-Hydroxydecanoic acid	-0.0077656	276
1-Hydroxy-2-naphthoic acid	0.019876	212
1'-Hydroxymidazolam .beta.-D-glucuronide	0.00718224	281
1-Methyladenosine	0.131768	3
1-Methylnicotinamide	0.0612523	97
2-[(5,6-Diphenylfuro[2,3-d]pyrimidin-4-yl)amino]ethanol	-0.0145496	235
2-[4-(4-Chlorobenzoyl)phenoxy]-2-methylpropanoic acid	-0.0318186	165
2-alpha-Mannobiose	0.0185048	220
2-Amino-1-phenylethanol	0.0679576	82
2-Amino-3-methoxybenzoic acid	0.0681681	81
2-Deoxyribose	0.0146544	234
2-Ethyl-2-phenylmalonamide	0.00717594	282
2-Hydroxy-4-methylpentanoic acid	0.0373168	153
2-Hydroxy-5-sulfopyridine-3-carboxylic acid	0.00849788	268
2-Hydroxybenzaldehyde	-0.0813755	55
2-Hydroxyibuprofen	0.00599797	291
2-Hydroxyisobutyric acid	-0.0056353	296
2-Propylglutaric acid	0.00197772	328
2-Pyridone	-0.065441	88
3-(1-Pyrazolyl)-alanine	-0.0312828	169
3-(3-Hydroxyphenyl)propionic acid	-0.0239918	195
3-(4-Formylaminobutyryl)pyridine	0.0437339	136
3,5-Bis(acetylamino)benzoic acid	-0.0168198	228
3,5-Dihydroxyphenylglycine	-0.00641992	286
3-Amino-1-propanol	0.0404634	145
3-Cysteinylacetaminophen	0.0695804	76
3-Dehydrocarnitine	0.104873	21
3-Hydroxy-3-methylglutaric acid	0.0401037	146
3-Hydroxybutyric acid	0.0194319	215
3-Hydroxybutyrylcarnitine	0.0420533	141
3-Hydroxypropanoic acid	-0.0118666	249
3-Hydroxyvaleric acid	0.059783	103
3-Indoleacetic acid	-0.0507688	121
3-Indolepropionic acid	-0.00518753	305
3-Methyl-2-oxovaleric acid	0.0489106	127
3-Methylcatechol	-0.0194656	214
3-Methylcrotonylglycine	0.101776	29
3-Methylhistidine	0.0453344	132
3-Phenyllactic acid	0.0644972	90
3-Pyridinemthanol	0.0424611	138
4-(Allylamino)benzoic acid	0.0572536	111
4-[3-(4-Butoxyphenoxy)propyl]morpholine	0.0352119	157
4-Acetamidobutyric acid	0.126055	6
4-Acetylbutyric acid	0.0622802	94
4-Aminobenzoic acid	0.0121686	246
4-Aminomethylcyclohexanecarboxylic acid	-0.0128437	244
4-Guanidinobutyric acid	0.00359498	314
4-Hydroxybenzoic acid	-0.0682925	79
4-Hydroxyhippuric acid	0.0721492	68
4-Hydroxyphenylacetic acid	0.00723401	279
4-Hydroxyquinoline	-0.00139491	331
4-Hydroxyvalsartan	-0.00722395	280
4-Imidazoleacrylic acid	0.000637827	338
4-Methyl-5-thiazoleethanol	-0.0651832	89
4-Methylumbelliferone	-0.0698501	75
4-Nitrophenol	0.0713521	70
4-Pyridoxic acid	0.00520836	304
5-Aminoimidazole-4-carboxamide	-0.00820939	269
6-(3,4-Dihydro-2(1H)-isoquinolinyl)-3-methyl[1,2,4]triazolo[3,4-a]phthalazine	0.104687	23
6-Hydroxycaproic acid	-0.060129	100
8-Oxo-2-deoxyadenosine	0.00805436	270
Abietic acid?	-0.0474525	129
Abscisic acid	-0.0365229	155
Acetaminophen	0.042692	137
Acetaminophen sulfate	0.0715104	69
Acetylcarnitine	0.110414	14
Acetylthiocholine cation	0.0943314	40
Adenine	-0.070832	72
Adipic acid	-0.00317553	320
Adipoyl-L-carnitine	0.0301919	175
Ala-Ile	0.0475873	128
Alanine	0.121537	8
Allantoin	0.0104821	257
Anserine	0.0380696	152
Arginine	0.0571945	112
Ascorbic acid	0.00783211	275
Aspartic acid	-0.0217313	203
Asp-phe	-0.00987758	260
Atorvastatin	0.0174738	224
Benidipine	-0.00243443	323
Benzoic acid	-0.0470641	130
Benzothiazole	-0.0944985	39
beta-Hydroxyisovaleric acid	0.0692394	77
Betaine aldehyde cation	0.00804646	271
Betonicine	0.0364476	156
Biotin	0.0813714	56
Bradykinin	-0.0817225	54
Bradykinin (1-5)	0.0323289	164
Bupivacaine	-0.0022396	326
Caffeine	-0.00545179	301
Carbamazepine	-0.00351716	316
Carboxyibuprofen	0.0055237	298
Carvedilol	0.0682365	80
Catechol	0.00513971	306
CCPA	-0.0217257	204
Chenodeoxycholic acid 24-acyl-.beta.-D-glucuronide	0.0245194	190
Cholic acid	-0.00134795	333
Choline	0.0953547	37
Citrulline	0.0399882	147
CMPF	0.00670891	284
Coniferylaldehyde	-0.0946329	38
Cotinine	-0.00345689	318
Creatine	0.11778	9
Creatinine	0.0939869	41
Cystine	0.0926976	42
Dehydrofelodipine	-0.00483261	307
Dehydroisoandrosterone sulfate	-0.0338479	159
Dextrorphan O-.beta.-D-glucuronide	-0.0212064	205
Diallyldimethylammonium cation	-0.0110697	253
Diatrizoic acid	-0.0148835	233
Diazoxide	-0.0262107	187
Diethanolamine	-0.0587347	106
disaccharide 01	0.0449761	133
disaccharide 02	0.0210601	206
disaccharide 03	0.0577814	109
disaccharide 04	0.058217	108
disaccharide 05	0.0297745	176
disaccharide 06	0.0291582	177
disaccharide 07	0.0317009	166
disaccharide 08	0.0585389	107
DMSO	-0.0857499	50
Docosahexanoic acid	-0.0676429	83
Docosatetraenoic acid	-0.0394938	148
Ecgonine	0.112452	12
Eicosenoic acid	0.00358237	315
Ergothioneine	0.0240177	194
Ethylenediaminetetraacetic acid	0.0128545	243
Ethylmalonic acid	0.0312009	171
Famotidine	0.0267991	183
Fluconazole	0.00163102	330
Furosemide	-0.00652189	285
Gabapentin	-0.00568811	293
Galactosamine	0.114171	10
Galactose	0.0913988	43
gamma-Glutamylglutamine	0.0491638	125
gamma-Glutamylleucine	0.0882021	48
Gentisinic acid	0.0413964	143
Glimepiride	0.00134161	334
Glucose	0.0196018	213
Glucuronic acid B	0.105789	19
Glutamic acid	-0.0085852	267
Glutamine	0.0639259	93
Glutaric acid	0.0557729	114
Glyceraldehyde	0.0963959	36
Glycerophosphocholine	-0.0867212	49
Glycine	0.0265852	184
Glycocholic acid	0.00274583	321
Glycodeoxycholic acid	0.0204418	211
Gly-val	-0.0328442	162
Guanosine	0.0313513	168
Hexadecanedioic acid	0.0262674	186
Hexaethylene glycol	0.0285224	179
Hexanoyl-L-carnitine	0.0761874	60
Hippuric acid	0.0143871	236
His-Pro	0.0218279	202
Histamine	-0.00431269	309
Histidine	0.0752463	62
His-Trp	-0.0133423	240
Homoarginine	-0.0249448	188
Homogentisic acid	0.0422457	139
Homoserine	0.0672927	84
Homovanillic acid sulfate	0.00363162	312
Hydroxybupropion	0.0170975	227
Hydroxychloroquine	0.104323	25
Hypaphorine	-0.0073606	278
Hypoxanthine	0.0615231	96
Ibuprofen .beta.-D-glucuronide	0.00543093	303
Ile-Ile	-0.0223351	199
Indarubicin	-0.0110158	254
Indolelactic acid	0.101371	31
Indoxyl sulfate	0.020989	207
Inosine	0.0244882	191
Iohexol	0.011962	248
Irbesartan	0.0732752	66
Isobutyric acid	0.0983533	34
Isoleucine	0.0834857	51
Isomaltose	0.0382999	149
Ketoisovaleric acid	0.0502425	123
Kynurenic acid	0.0986706	33
Kynurenine	0.0441761	135
Lacosamide	-0.0024247	324
Lactitol	0.0165607	231
Lactose A	0.023031	197
Lauroyl-L-carnitine	0.0366984	154
L-Carnitine	0.0986947	32
Leucine	0.0883029	47
Leu-Leu	-0.0218705	201
Levetiracetam	0.0591677	105
Levocetirizine	-0.0208863	208
L-Homocitrulline	0.106791	18
Linezolid	-0.000147751	340
Linoleic acid	0.0116171	251
Liquiritigenin	-0.0140431	238
Losartan	0.0190281	217
L-Propionylcarnitine	0.13545	2
Lysine	0.0812143	57
Maleic acid	-0.0163004	232
Malic acid	0.0668545	86
Malonyl-L-carnitine	0.139177	1
Maltotriose	0.00998816	259
Mannitol	0.0334846	160
Melatonin	0.00921164	264
Meperidine	0.00924425	263
Meprobamate	0.0109479	255
Metformin	-0.00620824	287
Methionine	0.0978307	35
Methioninesulfoxide	0.0618309	95
Methylecgonine	0.0641518	91
Metoclopramide	-0.0127217	245
Metoprolol acid	0.089478	45
Metronidazole	-0.0103719	258
myo-Inositol	0.113281	11
Myosmine	-0.0332748	161
Myristoyl-L-carnitine	0.0186183	218
N-(2-Furoyl)glycine	0.00567081	295
N-(4-Hydroxy-3-methylphenyl)acetamide	0.0503632	122
N,N-Dimethylarginine	0.111133	13
N,N-Dimethylformamide	0.0547466	116
N-.alpha.-Acetyl-L-ornithine	0.00558517	297
N.alpha.-Methyl-L-lysine	0.0608804	99
N.epsilon.-Dimethyl-L-lysine	0.0887057	46
N-[3-(Dimethylamino)propyl]tetradecanamide	-0.0121122	247
N2-(1-Oxo-4-phenylbutyl)-L-glutamine	0.101656	30
N8-Acetylspermidine	0.0803766	58
N-Acetyl-5-hydroxytryptamine	0.00608889	290
N-Acetylglycine	0.0415595	142
N-Acetylhistidine	0.0421982	140
N-Acetyl-L-carnosine	0.103852	28
N-Acetylmethionine	0.108866	15
N-Acetylsulfamethoxazole	-0.00544598	302
N-Acetyltryptophan	0.0092446	262
Naftopidil	0.0305929	174
Nalidixic acid	-0.0263803	185
Nandrolone	-0.00436037	308
N-epsilon-Acetyllysine	0.0661212	87
Nervonic acid	0.00104878	336
N-Formylmethionine	0.107768	16
Nicotinamide	-0.0555495	115
Nicotinic acid	-0.0752128	63
N-Isobutyrylglycine	0.0726525	67
N-Isovalerylglycine	0.103876	27
N-Methylalanine	-0.00619345	288
N-Methylanthranilic acid	0.0447778	134
N-Methylglutamic acid	0.0899277	44
N-Methylhistidine	0.125828	7
N-Methylisoleucine	-0.0243324	193
N-Methyllysine	0.0286738	178
N-Methylproline	-0.00136367	332
N-omega-Acetylhistamine	0.0035165	317
Norleucine	0.0756814	61
Norquetiapine	-0.0221848	200
Nudifloramide	0.0640331	92
O-Acetylsalicylic acid	-0.0167527	229
Octadecanedioic acid	0.0226757	198
Octanoylcarnitine	0.0533996	118
Oleoyl-L-carnitine	0.0599527	101
Omeprazole	-0.0136002	239
Ondansetron	-0.00211065	327
Ornithine	0.0497917	124
Oxazepam	-0.0036314	313
Oxypurinol	0.104811	22
p-Acetamidophenyl .beta.-D-glucuronide	0.0591872	104
Palatinose	0.0465126	131
Palmitic acid	0.0309385	172
P-Anisic acid	-0.0612424	98
Pantoprazole	-0.00568711	294
Pantothenic acid	0.0185452	219
Phenylacetylglutamine	0.0706689	73
Phenylacetylglycine	0.104129	26
Phenylalanine	0.0699483	74
Phenylalanylphenylalanine	-0.0133049	241
Phenyl-beta-glucopyranoside	0.0520703	119
Phe-Phe	-0.0117679	250
Phytosphingosine	-0.00253742	322
Pipecolic acid	0.0172721	225
Piperine	0.00550853	299
Piroxicam	0.0598277	102
Pro-Gln	0.0206073	209
Proline	0.0381251	150
Proline-hydroxyproline	0.0687757	78
Propionic acid	0.00427229	310
Pseudouridine	0.104901	20
Pyridostigmine cation	0.0181702	222
Pyroglutamic acid	-0.00610482	289
Pyruvic acid	0.0712716	71
Quetiapine	-0.00788757	274
Quinolone	0.020515	210
rac-4-Sulfoxypropranolol	0.00549707	300
Resveratrol	0.0183022	221
Riluzole	0.0175649	223
Salicylic acid	-0.0508377	120
Salicylic alcohol	0.00326948	319
Sebacic acid	0.00241068	325
Secoisolariciresinol	0.00101388	337
Serine	0.0233293	196
S-Methyl-3-thioacetaminophen	0.0271943	182
Sorbitol	0.0343058	158
Sulfamethoxazole	-0.00803737	272
Taurine	0.0275512	181
Taurocholic acid	0.00793779	273
Terasil Yellow 4G	-0.0172133	226
Tetradecanedioic acid	0.0490013	126
Tetrahydro-2H-pyran-4-amine	0.00762193	277
Theophylline	-0.0107134	256
Threonine	0.0831399	53
TMAO	0.040976	144
Trazodone	0.0307925	173
Trehalose	0.0278952	180
Tri-2-ethylhexyl trimellitate	0.0560495	113
Tridodecylmethylammonium cation	0.00939092	261
Trimethoprim	-0.0091458	265
Tris(2-butoxyethyl) phosphate	0.00123495	335
trisaccharide	0.0166972	230
Tryptophan	0.0327869	163
Tyrosine	0.0535457	117
Urea	0.12674	4
Urobilin	0.0312197	170
Val-Arg	0.00166574	329
Valine	0.0749418	64
Valsartan	-0.011155	252
Vanillic acid	-0.0191812	216
Vanillin	-0.0575727	110
Verbascose	0.014338	237
Vitexin	0.00399225	311
Xanthine	0.107401	17
Xanthinol	-0.000156488	339
Xanthosine	0.104442	24
Zolpidem phenyl-4-carboxylic acid	0.0746019	65

## Sheet: Linear Discriminant Analysis
Feature	Feature Coefficient: Pre-surgery	Feature Coefficient: Post-surgery	Feature Coefficient: Pre-radiation	Feature Coefficient: Post-radiation	Feature Coefficient: Mean Absolute	Rank
tetrasaccharide	0.188047	-0.0931198	-0.0825637	-0.0330721	0.0992008	253
(.+/-.)-Norketamine	-0.0527576	0.226829	-0.0811902	-0.0750243	0.10895	241
(2,4-Dinitrophenoxy)acetic acid	-0.143553	-0.142396	-0.167128	0.316508	0.192396	129
(2-oxo-2,3-dihydro-1H-indol-3-yl)acetic acid	0.45492	-0.190563	-0.0654799	-0.184584	0.223887	108
(2R)-3-Hydroxyisovaleroylcarnitine	0.216292	0.102755	0.166891	-0.345398	0.207834	117
(Diethylamino)(oxo)acetic acid	-0.242607	0.228327	0.35502	-0.182857	0.252203	80
1-(2-Hydroxyethyl)-2,2,6,6-tetramethyl-4-piperidinol	0.208511	0.230498	-0.202765	-0.21368	0.213864	114
1,2-Dilinoleoylglycerol	0.510594	-0.292348	-0.311131	-0.00968745	0.28094	61
1,3 Cyclohexanedione	0.127492	0.460557	-0.330383	-0.241138	0.289893	56
1,4-Cyclohexanedicarboxylic acid	0.151616	-0.0293645	-0.13646	-0.0186119	0.0840132	280
1,5-Pentanediamine	0.144693	-0.283766	0.580835	-0.251942	0.315309	40
10,11-Dihydro-10-hydroxycarbamazepine	-0.0709974	0.0169026	-0.0956993	0.100732	0.0710828	297
10-Hydroxydecanoic acid	-0.244344	-0.359766	0.304576	0.276036	0.296181	51
1-Hydroxy-2-naphthoic acid	-0.0767486	0.195366	0.0671289	-0.120701	0.114986	236
1'-Hydroxymidazolam .beta.-D-glucuronide	0.177267	-0.0581819	-0.0954004	-0.0423211	0.0932927	262
1-Methyladenosine	0.197008	-0.000873979	0.00342941	-0.158102	0.0898535	271
1-Methylnicotinamide	1.36522	-0.825268	-0.446841	-0.221734	0.714766	4
2-[(5,6-Diphenylfuro[2,3-d]pyrimidin-4-yl)amino]ethanol	0.557938	0.116764	-0.114317	-0.461182	0.31255	42
2-[4-(4-Chlorobenzoyl)phenoxy]-2-methylpropanoic acid	-0.201594	-0.209685	0.193285	0.198643	0.200802	126
2-alpha-Mannobiose	0.107884	-0.0659876	-0.0202497	-0.0258601	0.0549954	310
2-Amino-1-phenylethanol	0.178413	0.527519	-0.108939	-0.461196	0.319017	39
2-Amino-3-methoxybenzoic acid	-0.050685	0.0827172	0.103721	-0.0811301	0.0795634	286
2-Deoxyribose	-0.602587	-0.231277	0.207337	0.525014	0.391554	20
2-Ethyl-2-phenylmalonamide	0.0941429	-0.0107518	-0.0747245	-0.0229115	0.0506327	317
2-Hydroxy-4-methylpentanoic acid	0.00338526	0.37731	-0.155255	-0.185358	0.180327	149
2-Hydroxy-5-sulfopyridine-3-carboxylic acid	0.0605986	0.222455	-0.103447	-0.148861	0.13384	212
2-Hydroxybenzaldehyde	0.475105	-0.317588	-0.193142	-0.0328217	0.254664	77
2-Hydroxyibuprofen	-0.0306767	-0.0349005	-0.0740496	0.0935407	0.0582919	307
2-Hydroxyisobutyric acid	-0.0668335	-0.235505	-0.0748175	0.268649	0.161451	177
2-Propylglutaric acid	-0.16544	-0.094856	0.213177	0.0746177	0.137023	207
2-Pyridone	-0.042644	0.0156344	0.0147089	0.0138593	0.0217117	339
3-(1-Pyrazolyl)-alanine	0.0401395	-0.273541	0.050003	0.137463	0.125287	223
3-(3-Hydroxyphenyl)propionic acid	-0.117725	-0.311241	0.189128	0.208244	0.206584	119
3-(4-Formylaminobutyryl)pyridine	0.567744	-0.019521	-0.148355	-0.349753	0.271343	66
3,5-Bis(acetylamino)benzoic acid	-0.415855	-0.209539	-0.0728484	0.526233	0.306119	46
3,5-Dihydroxyphenylglycine	-0.0388861	0.395343	-0.0413726	-0.232143	0.176936	151
3-Amino-1-propanol	0.132278	0.0262807	-0.0442644	-0.098178	0.0752503	291
3-Cysteinylacetaminophen	-0.23628	0.410968	0.0269558	-0.126864	0.200267	128
3-Dehydrocarnitine	0.243525	-0.233958	0.13849	-0.105398	0.180343	148
3-Hydroxy-3-methylglutaric acid	-0.0797877	-0.0948146	0.530085	-0.180808	0.221374	111
3-Hydroxybutyric acid	0.746658	-0.312826	-0.234926	-0.227603	0.380503	21
3-Hydroxybutyrylcarnitine	0.164558	-0.011601	-0.046369	-0.0950612	0.0793972	287
3-Hydroxypropanoic acid	-0.0881712	0.0545651	0.358731	-0.181525	0.170748	164
3-Hydroxyvaleric acid	-0.0119563	0.225701	0.213606	-0.280857	0.18303	142
3-Indoleacetic acid	-0.207617	-0.332531	0.333333	0.210021	0.270875	67
3-Indolepropionic acid	-0.238705	0.115959	0.311668	-0.0786225	0.186239	141
3-Methyl-2-oxovaleric acid	-0.334877	-0.152369	0.264383	0.220967	0.243149	87
3-Methylcatechol	-0.0563069	-0.06679	-0.0529668	0.124663	0.0751816	292
3-Methylcrotonylglycine	-0.196785	0.147623	0.43924	-0.21038	0.248507	85
3-Methylhistidine	0.0264245	-0.275932	0.335332	-0.0184926	0.164045	173
3-Phenyllactic acid	0.00387865	0.363647	0.180502	-0.374216	0.230561	99
3-Pyridinemthanol	-0.0511355	0.221469	-0.058312	-0.0859355	0.104213	250
4-(Allylamino)benzoic acid	-0.128541	-0.0409509	0.309392	-0.0507921	0.132419	215
4-[3-(4-Butoxyphenoxy)propyl]morpholine	0.0745274	-0.305052	-0.337363	0.361923	0.269716	69
4-Acetamidobutyric acid	0.0178877	-0.0458553	0.020386	0.00707415	0.0228008	338
4-Acetylbutyric acid	-0.319744	0.325036	0.0366809	-0.00372358	0.171296	163
4-Aminobenzoic acid	-0.208542	-0.123528	-0.106593	0.318711	0.189343	136
4-Aminomethylcyclohexanecarboxylic acid	-0.336321	-0.356331	-0.00502329	0.529646	0.30683	45
4-Guanidinobutyric acid	-0.439471	-0.33332	0.324878	0.40002	0.374422	23
4-Hydroxybenzoic acid	0.0686825	-0.380707	0.207862	0.0994168	0.189167	137
4-Hydroxyhippuric acid	0.0656898	0.164253	-0.142789	-0.0873348	0.115017	235
4-Hydroxyphenylacetic acid	-0.290333	0.214504	0.045205	0.048232	0.149568	190
4-Hydroxyquinoline	-0.0734021	0.406917	-0.0157648	-0.228236	0.18108	146
4-Hydroxyvalsartan	-0.118919	-0.047578	-0.00251084	0.130681	0.0749221	294
4-Imidazoleacrylic acid	-0.144482	-0.0937391	0.110811	0.117624	0.116664	232
4-Methyl-5-thiazoleethanol	-0.0949566	0.0388169	-0.118158	0.117124	0.0922638	264
4-Methylumbelliferone	-0.150849	0.224273	-0.0482785	-0.0145856	0.109497	240
4-Nitrophenol	-0.165896	0.0448813	0.0816349	0.0510832	0.0858739	277
4-Pyridoxic acid	-0.140048	0.007048	-0.0801877	0.15366	0.0952359	258
5-Aminoimidazole-4-carboxamide	-0.167413	-0.151634	-0.124768	0.317175	0.190248	133
6-(3,4-Dihydro-2(1H)-isoquinolinyl)-3-methyl[1,2,4]triazolo[3,4-a]phthalazine	-0.0260104	0.0381352	-0.112032	0.059156	0.0588333	306
6-Hydroxycaproic acid	0.159807	-0.227797	-0.246442	0.184176	0.204555	121
8-Oxo-2-deoxyadenosine	-0.152882	0.0299845	-0.0874237	0.151463	0.105438	248
Abietic acid?	-0.160488	0.0165168	-0.128729	0.191716	0.124363	225
Abscisic acid	-0.570187	-0.320967	0.0622963	0.650177	0.400907	17
Acetaminophen	-0.0723575	0.215708	-0.0481892	-0.0708458	0.101775	251
Acetaminophen sulfate	-0.103757	0.264509	-0.0204439	-0.0977559	0.121616	227
Acetylcarnitine	-0.0746285	-0.119259	0.276302	-0.0171721	0.12184	226
Acetylthiocholine cation	-0.330444	0.164543	0.00735903	0.138837	0.160296	180
Adenine	-0.0595412	-0.225278	-0.119448	0.281784	0.171513	162
Adipic acid	0.597347	-0.178332	-0.235484	-0.206316	0.30437	47
Adipoyl-L-carnitine	-0.14497	0.0546701	0.174823	-0.0277474	0.100553	252
Ala-Ile	-0.00218191	-0.243835	0.130581	0.101908	0.119627	229
Alanine	0.132119	0.338529	-0.26866	-0.192544	0.232963	97
Allantoin	-0.804603	0.291954	0.557906	0.0980235	0.438122	11
Anserine	-0.105504	-0.297345	0.142378	0.216042	0.190317	132
Arginine	0.0467625	0.284277	-0.238887	-0.102784	0.168178	169
Ascorbic acid	-0.048883	0.0366191	0.00353623	0.0101625	0.0248002	336
Aspartic acid	-0.296225	-0.00353121	0.0683668	0.197803	0.141482	203
Asp-phe	-0.0326469	-0.0870016	0.0181297	0.07853	0.054077	312
Atorvastatin	-0.258744	0.489649	-0.121036	-0.0787685	0.237049	93
Benidipine	-0.176565	0.292099	0.0023627	-0.0733825	0.136102	209
Benzoic acid	-0.105	0.216733	-0.105786	-0.0115906	0.109778	239
Benzothiazole	-0.125026	-0.196033	-0.165465	0.339797	0.20658	120
beta-Hydroxyisovaleric acid	0.227373	0.372352	0.0643662	-0.489701	0.288448	58
Betaine aldehyde cation	-0.110976	-0.405653	-0.164869	0.480719	0.290554	55
Betonicine	-0.292927	0.380697	-0.179023	0.0619256	0.228643	103
Biotin	-0.266472	0.0937801	0.320163	-0.0454242	0.18146	144
Bradykinin	0.178804	-0.347137	-0.12706	0.185313	0.209578	116
Bradykinin (1-5)	0.356188	0.0933167	-0.402638	-0.113275	0.241355	89
Bupivacaine	1.13164	-0.2058	-0.515525	-0.445871	0.57471	8
Caffeine	-0.0226103	0.17859	0.00468848	-0.114669	0.0801394	284
Carbamazepine	0.0148985	-0.0667719	0.090062	-0.0165082	0.0470601	322
Carboxyibuprofen	-0.0453253	-0.0497229	-0.0427996	0.097507	0.0588387	305
Carvedilol	-0.299987	0.140774	0.252543	-0.0129852	0.176572	152
Catechol	-0.296549	-0.412706	0.162338	0.440114	0.327927	32
CCPA	-0.0230632	0.0991122	-0.0433374	-0.0281274	0.0484101	320
Chenodeoxycholic acid 24-acyl-.beta.-D-glucuronide	0.141032	-0.14755	0.298605	-0.181324	0.192128	130
Cholic acid	-0.325849	0.0469098	0.217617	0.0964895	0.171716	161
Choline	-0.136592	0.176185	-0.17207	0.0821958	0.141761	202
Citrulline	-0.0640724	-0.56575	0.0263371	0.446858	0.275755	64
CMPF	0.121383	0.00591156	-0.147122	-0.0139184	0.0720836	295
Coniferylaldehyde	-0.113587	-0.151784	-0.162209	0.296592	0.181043	147
Cotinine	-0.0439767	-0.0878	0.0658168	0.0599442	0.0643844	303
Creatine	0.00621644	0.563173	-0.130281	-0.337541	0.259303	74
Creatinine	-0.0385554	-0.277882	0.0685608	0.192252	0.144313	201
Cystine	-0.26077	0.256403	0.0553892	-0.0117741	0.146084	197
Dehydrofelodipine	-0.305178	0.57957	0.152489	-0.268858	0.326524	33
Dehydroisoandrosterone sulfate	-0.363415	-0.0977854	-0.0856548	0.410811	0.239417	91
Dextrorphan O-.beta.-D-glucuronide	-0.180392	-0.000913094	-0.162608	0.240244	0.146039	198
Diallyldimethylammonium cation	-0.12932	0.263303	0.333048	-0.285425	0.252774	79
Diatrizoic acid	-0.354869	-0.253467	-0.183554	0.575086	0.341744	28
Diazoxide	-0.401241	0.571903	0.236573	-0.236553	0.361567	25
Diethanolamine	0.147024	0.0252874	-0.094697	-0.0793847	0.0865984	276
disaccharide 01	-0.0834612	0.0667741	-0.107661	0.0814445	0.0848352	279
disaccharide 02	0.00104284	-0.0347443	-0.0423372	0.0494565	0.0318952	331
disaccharide 03	-0.0810828	0.0811873	-0.0643014	0.0434486	0.067505	299
disaccharide 04	-0.12679	0.0923976	-0.0348379	0.0542437	0.0770674	288
disaccharide 05	-0.0740397	-0.0158874	-0.0196624	0.0820684	0.0479145	321
disaccharide 06	-0.0116186	-0.0246654	-0.0224595	0.0404521	0.0247989	337
disaccharide 07	0.0593887	0.00685276	-0.0126102	-0.0447733	0.0309062	333
disaccharide 08	0.0855795	-0.0591355	0.0627251	-0.0621318	0.067393	301
DMSO	0.00956235	-0.0195532	-0.109567	0.0713585	0.0525104	315
Docosahexanoic acid	0.0417492	-0.174932	-0.285195	0.262538	0.191103	131
Docosatetraenoic acid	0.250194	-0.217853	-0.0199357	-0.0287993	0.129196	217
Ecgonine	-0.113931	0.106904	0.048894	-0.0160135	0.0714358	296
Eicosenoic acid	-0.0312415	-0.0171206	0.202493	-0.0823528	0.0833021	282
Ergothioneine	-0.0710588	0.122058	0.234198	-0.170635	0.149488	191
Ethylenediaminetetraacetic acid	0.00914861	-0.0334646	0.0476254	-0.0110817	0.0253301	335
Ethylmalonic acid	-0.271336	-0.407104	-0.0793958	0.558827	0.329166	31
Famotidine	-0.387207	0.529592	0.366324	-0.293616	0.394185	18
Fluconazole	0.117192	-0.234376	-0.390934	0.308241	0.262686	72
Furosemide	-0.284496	-0.130763	-0.0979978	0.379312	0.223142	109
Gabapentin	-0.0417027	-0.309405	-0.138505	0.340038	0.207413	118
Galactosamine	0.198113	0.1318	-0.1503	-0.164631	0.161211	178
Galactose	-0.129635	0.148889	0.0397804	-0.0286712	0.0867439	275
gamma-Glutamylglutamine	-0.260153	-0.149424	-0.120055	0.386554	0.229047	101
gamma-Glutamylleucine	-0.510538	0.0828607	0.137366	0.264677	0.24886	84
Gentisinic acid	-0.238571	0.0630586	0.300422	-0.0336111	0.158916	181
Glimepiride	-0.617898	0.240611	0.570913	-0.0208373	0.362565	24
Glucose	-0.713328	0.429962	0.258007	0.102262	0.37589	22
Glucuronic acid B	0.373057	-0.0640646	-0.289544	-0.0790632	0.201432	125
Glutamic acid	0.18857	-0.487891	-0.0173381	0.215077	0.227219	105
Glutamine	0.221739	-0.0471567	-0.27346	0.0195029	0.140465	205
Glutaric acid	-0.0922129	-0.140938	0.172916	0.0736737	0.119935	228
Glyceraldehyde	0.0254738	0.156984	0.0454093	-0.161266	0.0972835	255
Glycerophosphocholine	-0.0706014	-0.255688	-0.120685	0.31343	0.190101	135
Glycine	-0.118476	-0.115322	-0.249514	0.325553	0.202216	124
Glycocholic acid	-0.289384	0.0384967	-0.0902171	0.255505	0.168401	168
Glycodeoxycholic acid	-0.539645	-0.151583	0.148649	0.451667	0.322886	35
Gly-val	0.262373	-0.190735	-0.199567	0.0479358	0.175153	156
Guanosine	0.275594	0.309628	-0.117546	-0.374947	0.269429	70
Hexadecanedioic acid	0.331016	-0.148637	0.0109235	-0.161664	0.16306	174
Hexaethylene glycol	-0.148658	-0.00968965	0.324529	-0.066469	0.137336	206
Hexanoyl-L-carnitine	-0.168402	-0.141146	0.255013	0.0859177	0.16262	176
Hippuric acid	0.320807	-0.245621	-0.0204811	-0.0644518	0.16284	175
His-Pro	-0.331681	0.0310139	0.215413	0.113992	0.173025	158
Histamine	-0.127376	0.0860772	0.0429138	0.0133618	0.0674321	300
Histidine	0.286332	-0.243923	-0.40249	0.187469	0.280054	62
His-Trp	-0.438586	-0.0194356	0.48378	0.0771405	0.254736	76
Homoarginine	0.805988	-0.430466	-0.518616	-0.0216061	0.444169	10
Homogentisic acid	-0.243003	-0.0748336	0.0662256	0.208589	0.148163	194
Homoserine	0.0149546	0.264382	-0.356269	0.00634903	0.160489	179
Homovanillic acid sulfate	-0.00505967	-0.0547717	0.365671	-0.17222	0.149431	192
Hydroxybupropion	0.0355712	-0.167267	-0.441561	0.354276	0.249669	82
Hydroxychloroquine	-0.0420745	0.00106438	-0.186918	0.143146	0.0933007	261
Hypaphorine	0.204954	-0.152321	-0.0837472	-0.00276543	0.110947	237
Hypoxanthine	-0.0181811	0.172017	0.256003	-0.261915	0.177029	150
Ibuprofen .beta.-D-glucuronide	-0.0530019	0.0534975	-0.0235477	0.0171679	0.0368037	329
Ile-Ile	-0.587338	-0.0689391	0.303759	0.337844	0.32447	34
Indarubicin	0.536739	0.201926	-0.10546	-0.51149	0.338904	29
Indolelactic acid	-0.159214	0.0881636	0.0799295	0.0152977	0.0856513	278
Indoxyl sulfate	-0.501435	-0.0732751	0.134632	0.372604	0.270487	68
Inosine	0.0246772	0.344388	0.0686241	-0.310644	0.187083	140
Iohexol	-0.194663	0.311513	-0.036153	-0.0503467	0.148169	193
Irbesartan	-0.0435384	-0.0841372	0.140897	0.012566	0.0702847	298
Isobutyric acid	0.231106	0.103493	0.0527175	-0.290253	0.169393	167
Isoleucine	0.0287942	-0.203573	0.0438494	0.0992378	0.0938637	260
Isomaltose	0.227137	-0.235083	0.0834299	-0.0590069	0.151164	188
Ketoisovaleric acid	-0.0563154	0.0863567	0.0157816	-0.027334	0.0464469	323
Kynurenic acid	1.17194	-0.42095	-0.449418	-0.360511	0.600704	7
Kynurenine	-0.14254	-0.184197	0.28461	0.0791671	0.172628	159
Lacosamide	-0.12915	-0.199993	-0.230105	0.384154	0.235851	94
Lactitol	0.477953	-0.146773	-0.257648	-0.121199	0.250894	81
Lactose A	0.0184399	-0.0252453	-0.0196755	0.0153186	0.0196698	340
Lauroyl-L-carnitine	-0.0752174	-0.040793	-0.0637159	0.12715	0.0767191	289
L-Carnitine	-0.0230598	0.0907125	-0.191537	0.0655515	0.0927153	263
Leucine	0.135787	-0.137963	-0.0619399	0.0289256	0.0911539	267
Leu-Leu	-0.51681	-0.0889089	0.276714	0.312247	0.29867	50
Levetiracetam	0.575881	0.102766	-0.159678	-0.438471	0.319199	38
Levocetirizine	-0.133518	-0.101001	0.345803	-0.0246757	0.15125	187
L-Homocitrulline	-0.31662	-0.348961	0.186186	0.395627	0.311848	43
Linezolid	-0.126843	-0.116915	-0.0708494	0.227792	0.1356	211
Linoleic acid	1.99151	-0.87237	-0.747678	-0.507896	1.02986	3
Liquiritigenin	0.615101	-0.153829	-0.134856	-0.297722	0.300377	49
Losartan	-0.0792703	0.331529	-0.0567699	-0.14451	0.15302	186
L-Propionylcarnitine	-0.412273	0.145393	0.600245	-0.132486	0.322599	37
Lysine	0.192641	0.338439	-0.130764	-0.322105	0.245987	86
Maleic acid	-0.0734721	0.0417817	-0.236934	0.168064	0.130063	216
Malic acid	-0.280577	-0.348689	-0.00323156	0.478688	0.277796	63
Malonyl-L-carnitine	-0.0915131	-0.0674383	0.309819	-0.0612341	0.132501	214
Maltotriose	0.157765	-0.0801095	-0.0591616	-0.0322744	0.0823276	283
Mannitol	5.5552	-1.86535	-2.06902	-1.83968	2.83232	1
Melatonin	-0.21438	-0.234536	-0.243414	0.484937	0.294317	53
Meperidine	-0.107542	0.553423	-0.287665	-0.146961	0.273898	65
Meprobamate	-0.0243465	0.0279874	-0.0762831	0.0440885	0.0431764	327
Metformin	-0.169921	-0.0168725	0.128012	0.0717917	0.0966493	256
Methionine	0.541964	0.68575	-0.609649	-0.569588	0.601737	6
Methioninesulfoxide	-0.384983	0.0804376	-0.213639	0.373978	0.263259	71
Methylecgonine	-0.0213086	-0.24582	-0.213104	0.321653	0.200471	127
Metoclopramide	0.815217	-0.132842	-0.253843	-0.401857	0.40094	16
Metoprolol acid	-0.151145	-0.0106972	0.219117	-0.00146908	0.0956072	257
Metronidazole	-0.158551	0.35924	-0.0652246	-0.0966035	0.169905	165
myo-Inositol	0.105152	0.431504	-0.467171	-0.121409	0.281309	60
Myosmine	0.0123808	0.083035	-0.0770409	-0.0247133	0.0492925	318
Myristoyl-L-carnitine	0.0467434	0.0118251	-0.0878992	0.00615815	0.0381565	328
N-(2-Furoyl)glycine	-0.234743	0.158087	0.213556	-0.0544374	0.165206	172
N-(4-Hydroxy-3-methylphenyl)acetamide	-0.384824	0.654374	-0.297239	0.00584281	0.33557	30
N,N-Dimethylarginine	0.29976	-0.0878781	-0.321592	0.0154972	0.181182	145
N,N-Dimethylformamide	-0.0227051	-0.205372	-0.0436304	0.193204	0.116228	234
N-.alpha.-Acetyl-L-ornithine	-0.142996	-0.159927	-0.138113	0.31167	0.188176	139
N.alpha.-Methyl-L-lysine	-0.242787	0.0832258	-0.187268	0.243257	0.189134	138
N.epsilon.-Dimethyl-L-lysine	0.134268	-0.321294	0.0848422	0.0767304	0.154284	185
N-[3-(Dimethylamino)propyl]tetradecanamide	0.136613	0.104521	-0.0204893	-0.172578	0.10855	242
N2-(1-Oxo-4-phenylbutyl)-L-glutamine	0.0992862	0.17782	-0.240547	-0.0661601	0.145953	199
N8-Acetylspermidine	-0.170219	0.28232	-0.201898	0.0493808	0.175954	154
N-Acetyl-5-hydroxytryptamine	0.156052	-0.0977122	-0.105093	0.00903126	0.0919721	266
N-Acetylglycine	-0.00622894	-0.306192	0.0158143	0.218295	0.136633	208
N-Acetylhistidine	0.163948	-0.417251	-0.337176	0.372282	0.322664	36
N-Acetyl-L-carnosine	0.0620477	0.130431	0.0160982	-0.153728	0.0905762	269
N-Acetylmethionine	-0.322379	0.00914023	-0.0252396	0.264705	0.155366	184
N-Acetylsulfamethoxazole	0.409688	-0.149903	-0.252749	-0.0675163	0.219964	112
N-Acetyltryptophan	0.50967	-0.193882	-0.143735	-0.17948	0.256692	75
Naftopidil	-0.218759	0.161038	0.275047	-0.105634	0.190119	134
Nalidixic acid	0.41912	-0.114539	-0.280043	-0.0846095	0.224578	107
Nandrolone	-0.0942209	0.298263	-0.240917	0.000390397	0.158448	182
N-epsilon-Acetyllysine	-0.0547996	-0.247398	0.354135	0.0142548	0.167647	170
Nervonic acid	-0.150454	-0.0114666	0.245587	-0.0171005	0.106152	246
N-Formylmethionine	-0.235044	0.407212	-0.207006	0.0131345	0.215599	113
Nicotinamide	0.0549038	0.0485365	0.0965309	-0.136014	0.0839962	281
Nicotinic acid	-0.0228569	-0.122955	-0.0719565	0.150123	0.091973	265
N-Isobutyrylglycine	-0.495242	0.40415	0.537693	-0.217712	0.413699	15
N-Isovalerylglycine	-0.308027	0.218088	0.435563	-0.170966	0.283161	59
N-Methylalanine	0.181701	-0.539261	0.068733	0.20704	0.249184	83
N-Methylanthranilic acid	-0.11347	0.217953	-0.0651862	-0.0297318	0.106585	245
N-Methylglutamic acid	-0.143217	0.24545	0.226201	-0.198251	0.20328	123
N-Methylhistidine	0.0487659	-0.0719374	-0.104323	0.0751726	0.0750498	293
N-Methylisoleucine	-0.0393501	-0.525874	-0.439794	0.673633	0.419663	12
N-Methyllysine	0.534915	-0.28588	-0.293134	-0.0443716	0.289575	57
N-Methylproline	0.0366566	-0.0873917	0.0417987	0.0096997	0.0438867	325
N-omega-Acetylhistamine	0.217143	0.313034	-0.26855	-0.2417	0.260107	73
Norleucine	0.100938	-0.109102	0.00268958	-0.00253347	0.0538157	313
Norquetiapine	-0.0961949	0.0670042	-0.108955	0.0921705	0.091081	268
Nudifloramide	0.74903	-0.974844	-0.179632	0.219304	0.530702	9
O-Acetylsalicylic acid	-0.155703	-0.150777	0.127378	0.158241	0.148025	195
Octadecanedioic acid	1.33964	-0.499015	-0.44158	-0.441767	0.6805	5
Octanoylcarnitine	-0.276565	-0.192862	0.137761	0.278853	0.22151	110
Oleoyl-L-carnitine	0.0384622	0.0288547	-0.111939	0.0145657	0.0484554	319
Omeprazole	0.0542183	0.0176566	0.0322825	-0.0750453	0.0448007	324
Ondansetron	0.425802	-0.123	-0.285564	-0.0805091	0.228719	102
Ornithine	-0.276228	0.250718	-0.215966	0.165003	0.226979	106
Oxazepam	0.145003	-0.064297	-0.0627447	-0.0315058	0.0758877	290
Oxypurinol	-0.0132222	0.0716065	-0.0265556	-0.0258678	0.034313	330
p-Acetamidophenyl .beta.-D-glucuronide	0.00778406	0.221156	0.0207992	-0.179323	0.107266	244
Palatinose	-0.0618571	0.0694333	-0.118694	0.0688451	0.0797075	285
Palmitic acid	-0.388948	0.167733	0.249314	0.0400809	0.211519	115
P-Anisic acid	0.52928	0.123251	-0.202629	-0.39092	0.31152	44
Pantoprazole	-0.416188	0.260245	-0.085858	0.192523	0.238704	92
Pantothenic acid	0.0910215	-0.275544	-0.325942	0.320594	0.253276	78
Phenylacetylglutamine	0.13486	0.054417	0.151721	-0.236505	0.144376	200
Phenylacetylglycine	0.165969	-0.122218	0.0551726	-0.0757365	0.104774	249
Phenylalanine	0.16589	0.533386	-0.0839263	-0.470282	0.313371	41
Phenylalanylphenylalanine	-0.0119079	0.110443	-0.0663611	-0.0316367	0.0550872	309
Phenyl-beta-glucopyranoside	0.250077	0.281895	0.00406912	-0.406343	0.235596	95
Phe-Phe	-0.0275566	0.124951	-0.0197683	-0.0572719	0.0573868	308
Phytosphingosine	-0.0824766	-0.0497497	0.315757	-0.0847957	0.133195	213
Pipecolic acid	0.22203	-0.445278	0.00730357	0.142908	0.20438	122
Piperine	0.0316218	0.0394291	0.159628	-0.148155	0.0947084	259
Piroxicam	-0.23762	0.338303	-0.245792	0.0882181	0.227483	104
Pro-Gln	-0.416449	-0.218074	0.120898	0.418426	0.293462	54
Proline	-0.344183	0.138758	0.119667	0.102154	0.176191	153
Proline-hydroxyproline	-0.333685	-0.232236	0.446362	0.17057	0.295713	52
Propionic acid	-0.0487156	0.0139737	-0.0515346	0.0590406	0.0433162	326
Pseudouridine	-0.0322264	-0.497791	0.118166	0.317839	0.241506	88
Pyridostigmine cation	-0.146759	0.0882509	-0.141919	0.136419	0.128337	219
Pyroglutamic acid	0.235166	-0.524245	0.010263	0.188141	0.239454	90
Pyruvic acid	0.355657	-0.196619	-0.0223392	-0.126713	0.175332	155
Quetiapine	-0.0556398	0.487145	-0.174935	-0.206658	0.231095	98
Quinolone	0.00141351	-0.202661	-0.0266504	0.162014	0.0981847	254
rac-4-Sulfoxypropranolol	0.0993429	-0.0263992	-0.0453573	-0.0330213	0.0510302	316
Resveratrol	-0.0547877	0.0184396	0.00656498	0.0262912	0.0265209	334
Riluzole	0.59462	-0.0815255	-0.297771	-0.237747	0.302916	48
Salicylic acid	-0.151337	-0.0649588	0.112603	0.101086	0.107496	243
Salicylic alcohol	-0.228088	-0.0118233	-0.00706508	0.194207	0.110296	238
Sebacic acid	-0.22023	-0.699297	0.183164	0.575529	0.419555	14
Secoisolariciresinol	-0.297475	0.122525	0.28705	-0.0221013	0.182288	143
Serine	-0.080393	0.0965917	-0.20544	0.115097	0.124381	224
S-Methyl-3-thioacetaminophen	-0.366932	0.642314	-0.375154	0.0464216	0.357705	26
Sorbitol	5.28222	-1.83162	-1.95206	-1.71619	2.69552	2
Sulfamethoxazole	0.155061	-0.0804862	-0.214007	0.0616501	0.127801	220
Taurine	-0.355818	-0.328014	0.46903	0.244438	0.349325	27
Taurocholic acid	-0.308484	0.341876	-0.0199106	0.00851329	0.169696	166
Terasil Yellow 4G	-0.074869	-0.285871	0.156581	0.174936	0.173064	157
Tetradecanedioic acid	0.300036	-0.221222	-0.0719453	-0.0352632	0.157117	183
Tetrahydro-2H-pyran-4-amine	-0.29793	0.0194449	0.00796681	0.21814	0.13587	210
Theophylline	-0.187239	0.00971597	0.0521562	0.111054	0.0900412	270
Threonine	0.0520877	0.384362	-0.393096	-0.0886851	0.229558	100
TMAO	0.139972	0.044189	-0.0633122	-0.106067	0.0883851	274
Trazodone	-0.0428656	-0.0610609	-0.0232185	0.0922256	0.0548426	311
Trehalose	0.0658735	-0.0220132	-0.00517651	-0.0333309	0.0315985	332
Tri-2-ethylhexyl trimellitate	-0.104446	0.0108121	-0.0150774	0.0841278	0.0536157	314
Tridodecylmethylammonium cation	0.0925004	-0.239575	0.287544	-0.069256	0.172219	160
Trimethoprim	0.132429	-0.254441	-0.122439	0.152057	0.165341	171
Tris(2-butoxyethyl) phosphate	-0.128255	-0.0174635	-0.0611567	0.15086	0.0894336	272
trisaccharide	0.126953	-0.0545325	-0.0374223	-0.0392121	0.06453	302
Tryptophan	-0.799491	0.409046	0.321264	0.148633	0.419608	13
Tyrosine	-0.270633	0.216181	-0.0350289	0.0787527	0.150149	189
Urea	-0.0298228	0.108725	0.195977	-0.171155	0.12642	222
Urobilin	-0.0911305	-0.0521743	0.299734	-0.0666804	0.12743	221
Val-Arg	0.142308	0.1838	-0.0412327	-0.222508	0.147462	196
Valine	-0.177274	0.281499	0.0257332	-0.0789192	0.140856	204
Valsartan	-0.125664	-0.0727073	0.00770244	0.148286	0.08859	273
Vanillic acid	-0.559851	-0.319695	0.0419365	0.65306	0.393636	19
Vanillin	-0.0809746	0.085226	0.193056	-0.111649	0.117726	231
Verbascose	0.203931	-0.0864116	-0.0816591	-0.0511198	0.10578	247
Vitexin	0.236421	-0.183174	-0.0949403	0.00125659	0.128948	218
Xanthine	0.0608107	0.0349372	-0.141609	0.00989679	0.0618133	304
Xanthinol	-0.0553852	-0.230137	-0.278834	0.376194	0.235137	96
Xanthosine	-0.208143	0.0649716	0.181033	0.011342	0.116372	233
Zolpidem phenyl-4-carboxylic acid	0.149473	-0.00415408	-0.276783	0.0476757	0.119521	230

## Sheet: Random Forest
Feature	Feature Coefficient	Rank
tetrasaccharide	0.0010819	289
(.+/-.)-Norketamine	0.00166799	169
(2,4-Dinitrophenoxy)acetic acid	0.0017132	164
(2-oxo-2,3-dihydro-1H-indol-3-yl)acetic acid	0.00175656	159
(2R)-3-Hydroxyisovaleroylcarnitine	0.00762466	18
(Diethylamino)(oxo)acetic acid	0.00180308	151
1-(2-Hydroxyethyl)-2,2,6,6-tetramethyl-4-piperidinol	0.00167583	167
1,2-Dilinoleoylglycerol	0.00200468	131
1,3 Cyclohexanedione	0.015509	8
1,4-Cyclohexanedicarboxylic acid	0.00218276	115
1,5-Pentanediamine	0.00566111	33
10,11-Dihydro-10-hydroxycarbamazepine	0.00187404	145
10-Hydroxydecanoic acid	0.00457002	47
1-Hydroxy-2-naphthoic acid	0.0011302	279
1'-Hydroxymidazolam .beta.-D-glucuronide	0.00131752	233
1-Methyladenosine	0.00120066	261
1-Methylnicotinamide	0.00592975	31
2-[(5,6-Diphenylfuro[2,3-d]pyrimidin-4-yl)amino]ethanol	0.00231038	108
2-[4-(4-Chlorobenzoyl)phenoxy]-2-methylpropanoic acid	0.000901359	330
2-alpha-Mannobiose	0.00120079	260
2-Amino-1-phenylethanol	0.0068454	24
2-Amino-3-methoxybenzoic acid	0.00211094	121
2-Deoxyribose	0.00689162	23
2-Ethyl-2-phenylmalonamide	0.00263088	87
2-Hydroxy-4-methylpentanoic acid	0.00113299	277
2-Hydroxy-5-sulfopyridine-3-carboxylic acid	0.00179495	155
2-Hydroxybenzaldehyde	0.00143385	205
2-Hydroxyibuprofen	0.00226754	112
2-Hydroxyisobutyric acid	0.00191144	144
2-Propylglutaric acid	0.00146412	197
2-Pyridone	0.00261454	88
3-(1-Pyrazolyl)-alanine	0.00125299	248
3-(3-Hydroxyphenyl)propionic acid	0.00150907	193
3-(4-Formylaminobutyryl)pyridine	0.00276215	82
3,5-Bis(acetylamino)benzoic acid	0.00299926	75
3,5-Dihydroxyphenylglycine	0.00248621	97
3-Amino-1-propanol	0.00192052	140
3-Cysteinylacetaminophen	0.00495787	41
3-Dehydrocarnitine	0.00139812	218
3-Hydroxy-3-methylglutaric acid	0.00162227	175
3-Hydroxybutyric acid	0.00719507	20
3-Hydroxybutyrylcarnitine	0.00250063	96
3-Hydroxypropanoic acid	0.00159051	179
3-Hydroxyvaleric acid	0.00212725	119
3-Indoleacetic acid	0.00747023	19
3-Indolepropionic acid	0.00156306	182
3-Methyl-2-oxovaleric acid	0.00155318	184
3-Methylcatechol	0.00316457	70
3-Methylcrotonylglycine	0.00503064	40
3-Methylhistidine	0.0017248	161
3-Phenyllactic acid	0.00191613	141
3-Pyridinemthanol	0.00215301	117
4-(Allylamino)benzoic acid	0.00109475	285
4-[3-(4-Butoxyphenoxy)propyl]morpholine	0.00107939	290
4-Acetamidobutyric acid	0.00129161	237
4-Acetylbutyric acid	0.00201111	128
4-Aminobenzoic acid	0.00153774	188
4-Aminomethylcyclohexanecarboxylic acid	0.00192299	139
4-Guanidinobutyric acid	0.00494083	42
4-Hydroxybenzoic acid	0.00235786	101
4-Hydroxyhippuric acid	0.00116297	268
4-Hydroxyphenylacetic acid	0.00324496	67
4-Hydroxyquinoline	0.00141081	214
4-Hydroxyvalsartan	0.00103728	306
4-Imidazoleacrylic acid	0.00107809	291
4-Methyl-5-thiazoleethanol	0.00523672	38
4-Methylumbelliferone	0.00145058	202
4-Nitrophenol	0.00124109	253
4-Pyridoxic acid	0.00239821	99
5-Aminoimidazole-4-carboxamide	0.00105334	302
6-(3,4-Dihydro-2(1H)-isoquinolinyl)-3-methyl[1,2,4]triazolo[3,4-a]phthalazine	0.00312427	72
6-Hydroxycaproic acid	0.00180199	153
8-Oxo-2-deoxyadenosine	0.0023358	105
Abietic acid?	0.00109273	286
Abscisic acid	0.00114871	271
Acetaminophen	0.00665635	26
Acetaminophen sulfate	0.00781275	17
Acetylcarnitine	0.00186178	148
Acetylthiocholine cation	0.00115236	269
Adenine	0.00283365	80
Adipic acid	0.00120153	259
Adipoyl-L-carnitine	0.00128767	239
Ala-Ile	0.00106559	294
Alanine	0.00718924	21
Allantoin	0.00805114	13
Anserine	0.00142148	209
Arginine	0.00202788	127
Ascorbic acid	0.00124119	252
Aspartic acid	0.00142224	208
Asp-phe	0.00116591	267
Atorvastatin	0.00126104	247
Benidipine	0.00113531	276
Benzoic acid	0.00151273	192
Benzothiazole	0.00217092	116
beta-Hydroxyisovaleric acid	0.00324218	68
Betaine aldehyde cation	0.00269743	83
Betonicine	0.00434416	49
Biotin	0.00107457	293
Bradykinin	0.0014513	201
Bradykinin (1-5)	0.00200943	129
Bupivacaine	0.031501	3
Caffeine	0.00126401	245
Carbamazepine	0.00131789	232
Carboxyibuprofen	0.00140988	215
Carvedilol	0.00116918	266
Catechol	0.00473286	44
CCPA	0.000930403	326
Chenodeoxycholic acid 24-acyl-.beta.-D-glucuronide	0.00146676	196
Cholic acid	0.00390583	56
Choline	0.00120457	258
Citrulline	0.00259058	89
CMPF	0.000905381	328
Coniferylaldehyde	0.001699	165
Cotinine	0.000934097	324
Creatine	0.0133849	10
Creatinine	0.00123715	254
Cystine	0.00175859	158
Dehydrofelodipine	0.00312184	73
Dehydroisoandrosterone sulfate	0.00212736	118
Dextrorphan O-.beta.-D-glucuronide	0.000932323	325
Diallyldimethylammonium cation	0.00103017	309
Diatrizoic acid	0.00240781	98
Diazoxide	0.00372714	58
Diethanolamine	0.00155966	183
disaccharide 01	0.00199767	132
disaccharide 02	0.00133633	224
disaccharide 03	0.00153251	189
disaccharide 04	0.00153172	190
disaccharide 05	0.00127138	244
disaccharide 06	0.00176377	157
disaccharide 07	0.00186203	147
disaccharide 08	0.00202919	126
DMSO	0.00141262	213
Docosahexanoic acid	0.00165208	170
Docosatetraenoic acid	0.00180308	152
Ecgonine	0.001931	137
Eicosenoic acid	0.0025179	95
Ergothioneine	0.0035597	62
Ethylenediaminetetraacetic acid	0.00115037	270
Ethylmalonic acid	0.00177489	156
Famotidine	0.00559929	35
Fluconazole	0.000792274	339
Furosemide	0.000935753	323
Gabapentin	0.000888734	333
Galactosamine	0.00529273	37
Galactose	0.00459385	46
gamma-Glutamylglutamine	0.00144643	203
gamma-Glutamylleucine	0.00137691	220
Gentisinic acid	0.00238882	100
Glimepiride	0.00342487	65
Glucose	0.00350071	63
Glucuronic acid B	0.00124228	251
Glutamic acid	0.00256466	90
Glutamine	0.00195034	135
Glutaric acid	0.00128141	241
Glyceraldehyde	0.00431996	50
Glycerophosphocholine	0.00227953	111
Glycine	0.00235331	102
Glycocholic acid	0.00631818	28
Glycodeoxycholic acid	0.0150685	9
Gly-val	0.00144347	204
Guanosine	0.00153798	187
Hexadecanedioic acid	0.00343188	64
Hexaethylene glycol	0.00264977	85
Hexanoyl-L-carnitine	0.00105956	296
Hippuric acid	0.00151324	191
His-Pro	0.00254224	92
Histamine	0.00140366	216
Histidine	0.00162445	173
His-Trp	0.00284401	78
Homoarginine	0.0056159	34
Homogentisic acid	0.00173668	160
Homoserine	0.00224362	113
Homovanillic acid sulfate	0.00401777	55
Hydroxybupropion	0.00114178	273
Hydroxychloroquine	0.000936175	322
Hypaphorine	0.00114528	272
Hypoxanthine	0.00113663	275
Ibuprofen .beta.-D-glucuronide	0.00135133	223
Ile-Ile	0.00636901	27
Indarubicin	0.00141754	210
Indolelactic acid	0.00211383	120
Indoxyl sulfate	0.0067175	25
Inosine	0.00137185	221
Iohexol	0.00315964	71
Irbesartan	0.00103561	307
Isobutyric acid	0.00233381	106
Isoleucine	0.0020519	125
Isomaltose	0.00228931	109
Ketoisovaleric acid	0.00111004	283
Kynurenic acid	0.00373781	57
Kynurenine	0.00192882	138
Lacosamide	0.00141607	212
Lactitol	0.0268911	4
Lactose A	0.00141702	211
Lauroyl-L-carnitine	0.00105578	300
L-Carnitine	0.001694	166
Leucine	0.00252929	93
Leu-Leu	0.00423822	52
Levetiracetam	0.00358512	61
Levocetirizine	0.00105744	298
L-Homocitrulline	0.00210862	122
Linezolid	0.00102225	310
Linoleic acid	0.0162347	7
Liquiritigenin	0.0016286	171
Losartan	0.00104935	303
L-Propionylcarnitine	0.00419079	53
Lysine	0.00294321	76
Maleic acid	0.00193491	136
Malic acid	0.00132328	228
Malonyl-L-carnitine	0.00146411	198
Maltotriose	0.00123081	255
Mannitol	0.0474869	1
Melatonin	0.00143171	207
Meperidine	0.00105441	301
Meprobamate	0.00130731	235
Metformin	0.000796726	338
Methionine	0.00965242	11
Methioninesulfoxide	0.00200758	130
Methylecgonine	0.0021039	124
Metoclopramide	0.00101893	311
Metoprolol acid	0.00132231	231
Metronidazole	0.00121715	257
myo-Inositol	0.0016103	177
Myosmine	0.00277904	81
Myristoyl-L-carnitine	0.00118239	264
N-(2-Furoyl)glycine	0.017668	6
N-(4-Hydroxy-3-methylphenyl)acetamide	0.00426497	51
N,N-Dimethylarginine	0.00112563	281
N,N-Dimethylformamide	0.00109071	287
N-.alpha.-Acetyl-L-ornithine	0.00251979	94
N.alpha.-Methyl-L-lysine	0.00156614	180
N.epsilon.-Dimethyl-L-lysine	0.00101808	312
N-[3-(Dimethylamino)propyl]tetradecanamide	0.00107791	292
N2-(1-Oxo-4-phenylbutyl)-L-glutamine	0.00154496	185
N8-Acetylspermidine	0.0034018	66
N-Acetyl-5-hydroxytryptamine	0.00143234	206
N-Acetylglycine	0.00154471	186
N-Acetylhistidine	0.00570227	32
N-Acetyl-L-carnosine	0.00105629	299
N-Acetylmethionine	0.00105761	297
N-Acetylsulfamethoxazole	0.00101157	314
N-Acetyltryptophan	0.000798514	337
Naftopidil	0.00210463	123
Nalidixic acid	0.00113106	278
Nandrolone	0.00133597	225
N-epsilon-Acetyllysine	0.00184392	149
Nervonic acid	0.000916002	327
N-Formylmethionine	0.00162387	174
Nicotinamide	0.00559663	36
Nicotinic acid	0.00306693	74
N-Isobutyrylglycine	0.00466953	45
N-Isovalerylglycine	0.00415104	54
N-Methylalanine	0.00232448	107
N-Methylanthranilic acid	0.00605025	30
N-Methylglutamic acid	0.00446599	48
N-Methylhistidine	0.00103218	308
N-Methylisoleucine	0.022515	5
N-Methyllysine	0.000895307	331
N-Methylproline	0.00162708	172
N-omega-Acetylhistamine	0.00130628	236
Norleucine	0.000992009	316
Norquetiapine	0.000954835	321
Nudifloramide	0.00783998	15
O-Acetylsalicylic acid	0.00184097	150
Octadecanedioic acid	0.00822782	12
Octanoylcarnitine	0.00118449	263
Oleoyl-L-carnitine	0.00119625	262
Omeprazole	0.00112215	282
Ondansetron	0.0023515	103
Ornithine	0.00160316	178
Oxazepam	0.000987318	317
Oxypurinol	0.00127977	242
p-Acetamidophenyl .beta.-D-glucuronide	0.00484236	43
Palatinose	0.00179697	154
Palmitic acid	0.00131547	234
P-Anisic acid	0.00156409	181
Pantoprazole	0.00140009	217
Pantothenic acid	0.00139442	219
Phenylacetylglutamine	0.00147279	195
Phenylacetylglycine	0.00317487	69
Phenylalanine	0.00617705	29
Phenylalanylphenylalanine	0.00125025	249
Phenyl-beta-glucopyranoside	0.00283411	79
Phe-Phe	0.00128881	238
Phytosphingosine	0.000979623	320
Pipecolic acid	0.00118046	265
Piperine	0.00124406	250
Piroxicam	0.0011047	284
Pro-Gln	0.00363449	59
Proline	0.00222938	114
Proline-hydroxyproline	0.00126341	246
Propionic acid	0.00104156	305
Pseudouridine	0.00255708	91
Pyridostigmine cation	0.00101382	313
Pyroglutamic acid	0.00234568	104
Pyruvic acid	0.00199036	133
Quetiapine	0.00086052	335
Quinolone	0.00090383	329
rac-4-Sulfoxypropranolol	0.0014595	199
Resveratrol	0.000983955	318
Riluzole	0.00266211	84
Salicylic acid	0.00172035	163
Salicylic alcohol	0.00128196	240
Sebacic acid	0.00690326	22
Secoisolariciresinol	0.00196925	134
Serine	0.00191153	143
S-Methyl-3-thioacetaminophen	0.00802412	14
Sorbitol	0.0445026	2
Sulfamethoxazole	0.00121919	256
Taurine	0.00172043	162
Taurocholic acid	0.00360135	60
Terasil Yellow 4G	0.000834287	336
Tetradecanedioic acid	0.00167063	168
Tetrahydro-2H-pyran-4-amine	0.00133165	227
Theophylline	0.00135245	222
Threonine	0.0026493	86
TMAO	0.00228183	110
Trazodone	0.00112781	280
Trehalose	0.00161257	176
Tri-2-ethylhexyl trimellitate	0.000979763	319
Tridodecylmethylammonium cation	0.00114059	274
Trimethoprim	0.000753826	340
Tris(2-butoxyethyl) phosphate	0.000874557	334
trisaccharide	0.00132309	230
Tryptophan	0.00511825	39
Tyrosine	0.00292351	77
Urea	0.001275	243
Urobilin	0.001455	200
Val-Arg	0.00106199	295
Valine	0.00133426	226
Valsartan	0.00104195	304
Vanillic acid	0.00783436	16
Vanillin	0.00132317	229
Verbascose	0.000998287	315
Vitexin	0.00109049	288
Xanthine	0.00186688	146
Xanthinol	0.00191404	142
Xanthosine	0.00148162	194
Zolpidem phenyl-4-carboxylic acid	0.000895214	332

## Sheet: Sequential Feature Selection
Feature	Rank
tetrasaccharide	289
(.+/-.)-Norketamine	51
(2,4-Dinitrophenoxy)acetic acid	322
(2-oxo-2,3-dihydro-1H-indol-3-yl)acetic acid	254
(2R)-3-Hydroxyisovaleroylcarnitine	205
(Diethylamino)(oxo)acetic acid	229
1-(2-Hydroxyethyl)-2,2,6,6-tetramethyl-4-piperidinol	11
1,2-Dilinoleoylglycerol	87
1,3 Cyclohexanedione	256
1,4-Cyclohexanedicarboxylic acid	59
1,5-Pentanediamine	210
10,11-Dihydro-10-hydroxycarbamazepine	83
10-Hydroxydecanoic acid	338
1-Hydroxy-2-naphthoic acid	38
1'-Hydroxymidazolam .beta.-D-glucuronide	68
1-Methyladenosine	34
1-Methylnicotinamide	240
2-[(5,6-Diphenylfuro[2,3-d]pyrimidin-4-yl)amino]ethanol	134
2-[4-(4-Chlorobenzoyl)phenoxy]-2-methylpropanoic acid	122
2-alpha-Mannobiose	263
2-Amino-1-phenylethanol	119
2-Amino-3-methoxybenzoic acid	214
2-Deoxyribose	32
2-Ethyl-2-phenylmalonamide	190
2-Hydroxy-4-methylpentanoic acid	20
2-Hydroxy-5-sulfopyridine-3-carboxylic acid	208
2-Hydroxybenzaldehyde	171
2-Hydroxyibuprofen	15
2-Hydroxyisobutyric acid	319
2-Propylglutaric acid	301
2-Pyridone	261
3-(1-Pyrazolyl)-alanine	13
3-(3-Hydroxyphenyl)propionic acid	169
3-(4-Formylaminobutyryl)pyridine	170
3,5-Bis(acetylamino)benzoic acid	203
3,5-Dihydroxyphenylglycine	212
3-Amino-1-propanol	323
3-Cysteinylacetaminophen	265
3-Dehydrocarnitine	160
3-Hydroxy-3-methylglutaric acid	96
3-Hydroxybutyric acid	117
3-Hydroxybutyrylcarnitine	209
3-Hydroxypropanoic acid	137
3-Hydroxyvaleric acid	246
3-Indoleacetic acid	337
3-Indolepropionic acid	297
3-Methyl-2-oxovaleric acid	120
3-Methylcatechol	125
3-Methylcrotonylglycine	116
3-Methylhistidine	145
3-Phenyllactic acid	232
3-Pyridinemthanol	299
4-(Allylamino)benzoic acid	31
4-[3-(4-Butoxyphenoxy)propyl]morpholine	133
4-Acetamidobutyric acid	288
4-Acetylbutyric acid	303
4-Aminobenzoic acid	309
4-Aminomethylcyclohexanecarboxylic acid	292
4-Guanidinobutyric acid	90
4-Hydroxybenzoic acid	238
4-Hydroxyhippuric acid	60
4-Hydroxyphenylacetic acid	227
4-Hydroxyquinoline	23
4-Hydroxyvalsartan	113
4-Imidazoleacrylic acid	124
4-Methyl-5-thiazoleethanol	21
4-Methylumbelliferone	41
4-Nitrophenol	151
4-Pyridoxic acid	194
5-Aminoimidazole-4-carboxamide	175
6-(3,4-Dihydro-2(1H)-isoquinolinyl)-3-methyl[1,2,4]triazolo[3,4-a]phthalazine	221
6-Hydroxycaproic acid	2
8-Oxo-2-deoxyadenosine	178
Abietic acid?	234
Abscisic acid	313
Acetaminophen	14
Acetaminophen sulfate	174
Acetylcarnitine	235
Acetylthiocholine cation	19
Adenine	196
Adipic acid	143
Adipoyl-L-carnitine	26
Ala-Ile	333
Alanine	332
Allantoin	16
Anserine	73
Arginine	79
Ascorbic acid	69
Aspartic acid	130
Asp-phe	223
Atorvastatin	161
Benidipine	62
Benzoic acid	340
Benzothiazole	274
beta-Hydroxyisovaleric acid	308
Betaine aldehyde cation	147
Betonicine	3
Biotin	93
Bradykinin	47
Bradykinin (1-5)	91
Bupivacaine	310
Caffeine	44
Carbamazepine	86
Carboxyibuprofen	78
Carvedilol	295
Catechol	273
CCPA	64
Chenodeoxycholic acid 24-acyl-.beta.-D-glucuronide	262
Cholic acid	290
Choline	109
Citrulline	244
CMPF	247
Coniferylaldehyde	97
Cotinine	328
Creatine	42
Creatinine	45
Cystine	312
Dehydrofelodipine	266
Dehydroisoandrosterone sulfate	101
Dextrorphan O-.beta.-D-glucuronide	50
Diallyldimethylammonium cation	54
Diatrizoic acid	159
Diazoxide	200
Diethanolamine	201
disaccharide 01	163
disaccharide 02	94
disaccharide 03	321
disaccharide 04	191
disaccharide 05	199
disaccharide 06	29
disaccharide 07	275
disaccharide 08	281
DMSO	230
Docosahexanoic acid	267
Docosatetraenoic acid	85
Ecgonine	144
Eicosenoic acid	72
Ergothioneine	123
Ethylenediaminetetraacetic acid	156
Ethylmalonic acid	76
Famotidine	10
Fluconazole	81
Furosemide	102
Gabapentin	320
Galactosamine	5
Galactose	317
gamma-Glutamylglutamine	219
gamma-Glutamylleucine	242
Gentisinic acid	140
Glimepiride	280
Glucose	330
Glucuronic acid B	276
Glutamic acid	252
Glutamine	108
Glutaric acid	183
Glyceraldehyde	43
Glycerophosphocholine	146
Glycine	35
Glycocholic acid	228
Glycodeoxycholic acid	189
Gly-val	206
Guanosine	173
Hexadecanedioic acid	67
Hexaethylene glycol	22
Hexanoyl-L-carnitine	39
Hippuric acid	197
His-Pro	152
Histamine	103
Histidine	131
His-Trp	57
Homoarginine	33
Homogentisic acid	249
Homoserine	56
Homovanillic acid sulfate	70
Hydroxybupropion	27
Hydroxychloroquine	114
Hypaphorine	300
Hypoxanthine	302
Ibuprofen .beta.-D-glucuronide	216
Ile-Ile	198
Indarubicin	233
Indolelactic acid	155
Indoxyl sulfate	294
Inosine	239
Iohexol	176
Irbesartan	257
Isobutyric acid	37
Isoleucine	335
Isomaltose	153
Ketoisovaleric acid	89
Kynurenic acid	65
Kynurenine	4
Lacosamide	286
Lactitol	58
Lactose A	115
Lauroyl-L-carnitine	285
L-Carnitine	107
Leucine	270
Leu-Leu	185
Levetiracetam	258
Levocetirizine	154
L-Homocitrulline	9
Linezolid	279
Linoleic acid	225
Liquiritigenin	8
Losartan	307
L-Propionylcarnitine	241
Lysine	182
Maleic acid	331
Malic acid	82
Malonyl-L-carnitine	77
Maltotriose	304
Mannitol	150
Melatonin	12
Meperidine	17
Meprobamate	195
Metformin	259
Methionine	311
Methioninesulfoxide	188
Methylecgonine	104
Metoclopramide	53
Metoprolol acid	28
Metronidazole	127
myo-Inositol	293
Myosmine	334
Myristoyl-L-carnitine	111
N-(2-Furoyl)glycine	24
N-(4-Hydroxy-3-methylphenyl)acetamide	48
N,N-Dimethylarginine	52
N,N-Dimethylformamide	135
N-.alpha.-Acetyl-L-ornithine	157
N.alpha.-Methyl-L-lysine	193
N.epsilon.-Dimethyl-L-lysine	207
N-[3-(Dimethylamino)propyl]tetradecanamide	287
N2-(1-Oxo-4-phenylbutyl)-L-glutamine	272
N8-Acetylspermidine	110
N-Acetyl-5-hydroxytryptamine	248
N-Acetylglycine	112
N-Acetylhistidine	138
N-Acetyl-L-carnosine	237
N-Acetylmethionine	139
N-Acetylsulfamethoxazole	291
N-Acetyltryptophan	164
Naftopidil	264
Nalidixic acid	49
Nandrolone	142
N-epsilon-Acetyllysine	325
Nervonic acid	181
N-Formylmethionine	166
Nicotinamide	61
Nicotinic acid	217
N-Isobutyrylglycine	158
N-Isovalerylglycine	220
N-Methylalanine	172
N-Methylanthranilic acid	278
N-Methylglutamic acid	324
N-Methylhistidine	318
N-Methylisoleucine	7
N-Methyllysine	66
N-Methylproline	136
N-omega-Acetylhistamine	106
Norleucine	121
Norquetiapine	141
Nudifloramide	6
O-Acetylsalicylic acid	283
Octadecanedioic acid	132
Octanoylcarnitine	218
Oleoyl-L-carnitine	316
Omeprazole	186
Ondansetron	36
Ornithine	84
Oxazepam	236
Oxypurinol	63
p-Acetamidophenyl .beta.-D-glucuronide	165
Palatinose	98
Palmitic acid	224
P-Anisic acid	211
Pantoprazole	162
Pantothenic acid	177
Phenylacetylglutamine	25
Phenylacetylglycine	18
Phenylalanine	326
Phenylalanylphenylalanine	118
Phenyl-beta-glucopyranoside	99
Phe-Phe	184
Phytosphingosine	260
Pipecolic acid	204
Piperine	128
Piroxicam	40
Pro-Gln	250
Proline	213
Proline-hydroxyproline	305
Propionic acid	55
Pseudouridine	251
Pyridostigmine cation	88
Pyroglutamic acid	339
Pyruvic acid	46
Quetiapine	126
Quinolone	30
rac-4-Sulfoxypropranolol	282
Resveratrol	202
Riluzole	179
Salicylic acid	215
Salicylic alcohol	71
Sebacic acid	168
Secoisolariciresinol	253
Serine	284
S-Methyl-3-thioacetaminophen	271
Sorbitol	1
Sulfamethoxazole	148
Taurine	255
Taurocholic acid	277
Terasil Yellow 4G	75
Tetradecanedioic acid	296
Tetrahydro-2H-pyran-4-amine	336
Theophylline	226
Threonine	100
TMAO	315
Trazodone	269
Trehalose	167
Tri-2-ethylhexyl trimellitate	180
Tridodecylmethylammonium cation	149
Trimethoprim	105
Tris(2-butoxyethyl) phosphate	306
trisaccharide	129
Tryptophan	231
Tyrosine	187
Urea	314
Urobilin	243
Val-Arg	95
Valine	268
Valsartan	222
Vanillic acid	329
Vanillin	327
Verbascose	92
Vitexin	192
Xanthine	298
Xanthinol	74
Xanthosine	80
Zolpidem phenyl-4-carboxylic acid	245
